## Research Paper: Gerotarget (Focus on Aging)

**Age-related decline in cardiac autonomic function is not attenuated with increased physical activity**

**Hugo Njemanze<sup>1</sup>, Charlotte Warren<sup>1,2</sup>, Christopher Eggett<sup>1</sup>, Guy A. MacGowan<sup>3,4</sup>, Matthew G.D. Bates<sup>1,5</sup>, Mario Siervo<sup>1</sup>, Srdjan Ivkovic<sup>6</sup>, Michael I. Trenell<sup>1,2</sup> and Djordje G. Jakovljevic<sup>1,2,7</sup>**

<sup>1</sup> Faculty of Medical Sciences, Institute of Cellular Medicine, MoveLab, Newcastle University, Newcastle upon Tyne, UK

<sup>2</sup> MRC Centre for Ageing and Vitality, Newcastle University, UK

<sup>3</sup> Department of Cardiology, Freeman Hospital, Newcastle upon Tyne, UK

<sup>4</sup> Institute of Genetic Medicine, Newcastle University, Newcastle upon Tyne, UK

<sup>5</sup> Cardiothoracic Department, James Cook University Hospital, Middlesbrough, UK

<sup>6</sup> Faculty of Medical Sciences, Centre for Rehabilitation, University of Pristina, Kosovska Mitrovica, Serbia

<sup>7</sup> Clinical Research Facility, Royal Victoria Infirmary, Newcastle upon Tyne, UK

**Correspondence to:** Djordje Jakovljevic, **email:** djordje.jakovljevic@newcastle.ac.uk

**Keywords:** aging, cardiac autonomic function, physical activity, women, Gerotarget

**Received:** June 16, 2016

**Accepted:** September 23, 2016

**Published:** October 02, 2016

This is an open-access article distributed under the terms of the Creative Commons Attribution License, which permits unrestricted use, distribution, and reproduction in any medium, provided the original author and source are credited.

**ABSTRACT**

**Age and physical inactivity are important risk factors for cardiovascular mortality. Heart rate response to exercise (HRRE) and heart rate recovery (HRR), measures of cardiac autonomic function, are strong predictors of mortality. The present study defined the effect of age and physical activity on HRRE and HRR. Healthy women (N=72) grouped according to age (young, 20-30 years; middle, 40-50 years; and older, 65-81 years) and daily physical activity (low active <7500, high active >12,500 steps/day) performed a maximal cardiopulmonary exercise test. The HRRE was defined as an increase in heart rate from rest to 1, 3 and 5 minutes of exercise and at 1/3 of total exercise time, and HRR as the difference in heart rate between peak exercise and 1, 2, and 3 minutes later. Age was associated with a significant decline in HRRE at 1 min and 1/3 of exercise time ( $r=-0.27$ ,  $p=0.04$ , and  $r=-0.39$ ,  $p=0.02$ ) and HRR at 2 min and 3 min ( $r=-0.35$ ,  $p=0.01$ , and  $r=-0.31$ ,  $p=0.02$ ). There was no significant difference in HRRE and HRR between high and low-active middle-age and older women ( $p>0.05$ ). Increased level of habitual physical activity level appears to have a limited effect on age-related decline in cardiac autonomic function in women.**

**INTRODUCTION**

Age is the major risk factor for developing cardiovascular diseases. The number of people of the age 65 and above increases rapidly and will continue to do so in the next 20 years [1]. By 2030 approximately 20% of the population will be aged 65 and older. In this particular age group cardiac disease is the leading cause of morbidity and mortality and accounts for 40% of all deaths [1]. Aging is also associated with an increased incidence and prevalence of hypertension, coronary artery disease and heart failure [2]. Chronological age, in the absence of apparent cardiac disease, leads to concentric cardiac remodelling and a decline in diastolic function,

cardiac metabolism, and maximal performance [3]. These subclinical changes may lead to cardiac pathology and increased incidence of heart failure in older age [2].

The autonomic nervous system, comprising sympathetic and parasympathetic neural outflows, combined with afferent inputs and central control mechanism plays a vital role in cardiovascular homeostasis [4]. It regulates heart rate, systemic vascular resistance and myocardial contractility [4, 5]. Measures of cardiac autonomic function also decline with age, including heart rate response to exercise and heart rate recovery following exercise, which have been shown to be strong predictors of morbidity and mortality in healthy individuals and those with cardiac diseases [6-10].

**Table 1: Demographic details, resting, and exercise cardiovascular and metabolic measures in different age groups**

|                                                        | Young       | Middle-age  | Older       |
|--------------------------------------------------------|-------------|-------------|-------------|
| <b>Demographics</b>                                    |             |             |             |
| Age, y                                                 | 22±3**      | 45±3†       | 72±5*       |
| Weight, Kg                                             | 66.0±15.0   | 69.5±11.9   | 66.6±10.7   |
| Height, m                                              | 1.65±0.06†  | 1.67±0.05†  | 1.59±0.05   |
| Body mass index, Kg/m <sup>2</sup>                     | 24±5        | 25±4        | 26±3        |
| <b>Resting metabolic and cardiac variables</b>         |             |             |             |
| Oxygen consumption, L/min                              | 0.25±0.05   | 0.25±0.04   | 0.24±0.03   |
| Respiratory exchange ratio                             | 0.89±0.16   | 0.91±0.07   | 0.92±0.11   |
| Heart rate, bpm                                        | 76±11       | 71±10       | 70±8        |
| Stroke Volume, mL/beat                                 | 88.7±15.5†  | 88.3±16.3†  | 73.1±14.0   |
| Cardiac power output, watts                            | 1.29±0.30   | 1.39±0.34   | 1.17±0.21   |
| Mean arterial blood pressure, mmHg                     | 89±8        | 100±10*     | 104±10*     |
| Cardiac output, L/min                                  | 6.5±1.1†    | 6.3±1.3†    | 5.1±0.8     |
| Systemic vascular resistance dyne/(s-cm <sup>5</sup> ) | 1118±187†   | 1316±278†   | 1693±344    |
| Fasting glucose, mmol/L                                | 5.1±0.5     | 4.6±0.3     | 5.3±0.5     |
| Total cholesterol, mmol/L                              | 4.4±0.9     | 4.4±1.7     | 5.5±0.8     |
| Triglycerides, mmol/L                                  | 0.8±0.3     | 0.9±0.5     | 1.2±0.6     |
| <b>Peak exercise metabolic and cardiac variables</b>   |             |             |             |
| Oxygen consumption, L/min                              | 1.85±0.32†  | 1.96±0.44†  | 1.37±0.23   |
| Oxygen consumption, ml/kg/min                          | 29.37±6.44† | 28.69±8.41† | 21.0±4.38   |
| Respiratory exchange ratio                             | 1.17±0.07   | 1.20±0.08   | 1.17±0.11   |
| Heart rate, bpm                                        | 178±11.83†  | 170±10.15†  | 140±13.65   |
| Stroke Volume, mL                                      | 87.3±16.2   | 92.7±19.32  | 87.0±17.0   |
| Cardiac Output L/min                                   | 15.4±2.6†   | 15.4±2.9†   | 12.1±2.3    |
| Cardiac power output, watts                            | 3.83±0.84†  | 4.13±0.78†  | 3.38±0.71   |
| Mean arterial pressure, mmHg                           | 111.6±11.71 | 121.6±10.7* | 125.8±9.22* |
| Systemic vascular resistance dyne/(s-cm <sup>5</sup> ) | 586±110†    | 654±113†    | 862±180     |

\*significant difference from young (p<0.05) \*\*significant difference from middle (p<0.05) †significant difference from old (P<0.05)

Higher levels of physical activity are associated with a 30–40% reduced rate of all-cause and cardiovascular mortality in both women and men [11–14]. The most recent data from the Women’s Health Initiative study suggest that low active and sedentary women had 63% greater risk of developing cardiovascular disease than high active women [15]. A recent study in women also suggests that higher levels of habitual physical activity preserve cardiac metabolism and exercise capacity with ageing [3].

Exercise training improves cardiac autonomic regulation of the heart in both healthy people and those with cardiac disorders [16–19]. However, limited evidence is available on the effect of objectively evaluated habitual daily physical activity (as distinct from exercise training, *per se*) on the age-related changes in cardiac autonomic regulation and heart rate response to exercise (HRRE) and heart rate recovery (HRR) following exercise. Due to a significant difference in cardiac ageing between men and women

previously described (2-5), the present study was designed to define the effect of habitual daily (ambulatory) physical activity on age-related changes in cardiac autonomic function represented by HRRE and HRR in women. We hypothesized that a high level of daily physical activity (i.e. >12,500 steps per day) will attenuate age-related changes in cardiac autonomic function in women.

## RESULTS

Out of the 129 women who were contacted by the research team, a total of 72 met the study inclusion criteria and were further stratified according to daily physical activity into low- or high-active group. In terms of intensity, the level of physical activity ranged from low to moderate ( $\leq 6$  metabolic equivalent units), which was expected as none of the participants were taking part in regular exercise.

Table 1 shows demographic details, resting, and exercise cardiovascular and metabolic measures in different age groups. There was a mild to moderate significant relationship between the age HRRE and HRR (Figure 1), with older women demonstrating significantly lower HRRE at 1/3 exercise time ( $p < 0.05$ , Table 2). HRR at two minutes following exercise was significantly lower in older group ( $p < 0.05$ , Table 2).

Table 3 shows cardiac and metabolic variables stratified by age and physical activity. At peak exercise there were no significant differences in cardiac output,

mean arterial blood pressure and cardiac power output between very active and low active groups. However, there was a significant difference in peak oxygen consumption between high and low active groups ( $p < 0.05$ ). Interestingly, in contrast to young-age group, physical activity had no effect on measures of cardiac autonomic function in middle- and older-age groups (Table 4).

When data were combined from all age groups and activity levels, there were no significant relationships between HRR at one minute and maximum cardiac power output ( $r = 0.17$ ,  $p = 0.21$ ) or maximum stroke volume ( $r = 0.12$ ;  $p = 0.35$ ). There was also no significant relationship between HRR at one minute and maximum oxygen consumption ( $r = 0.23$ ;  $p = 0.07$ ) or maximum work rate ( $r = 0.26$ ;  $p = 0.05$ ).

## DISCUSSION

Heart rate response to exercise and recovery is an established measure of cardiac autonomic function and strong indicator of all-cause and cardiovascular mortality [7-10]. The present study is the first to evaluate the effect of objectively measured daily physical activity on age related changes in autonomic function, as assessed by HRRE and HRR. The major findings suggest that ageing is associated with a significant decline in cardiac autonomic function, and increased levels of daily physical activity have limited effect on this age-related decline in heart rate response to exercise and recovery.

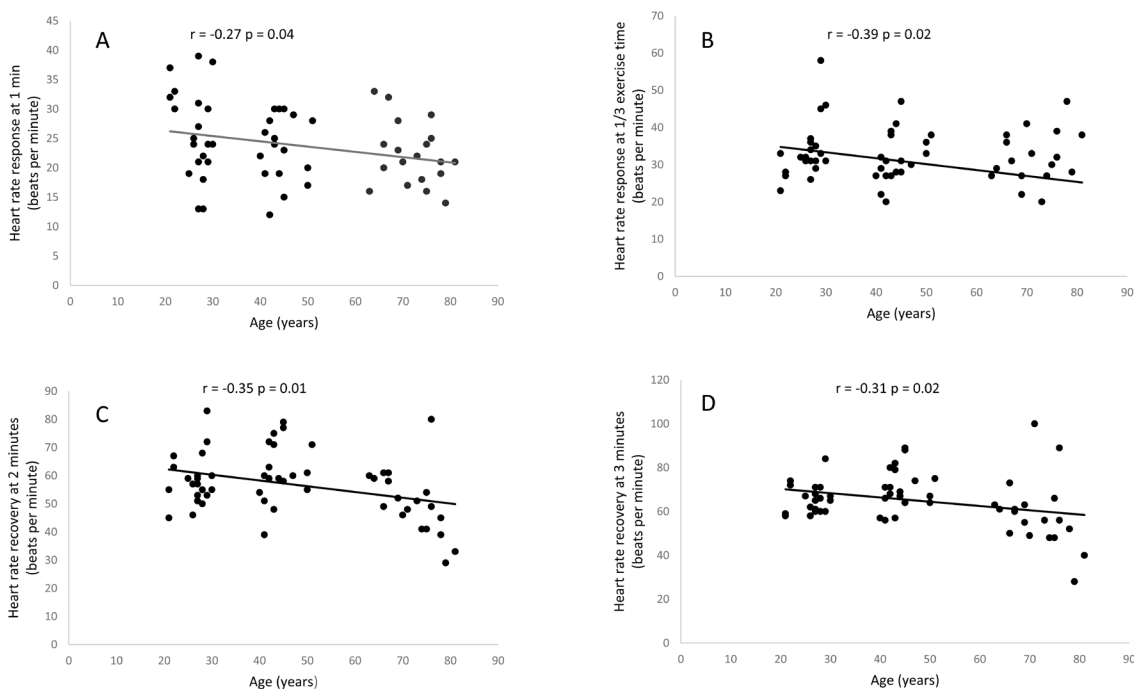

**Figure 1:** Relationship between age and heart rate response at one minute (A), heart rate response at 1/3 exercise time (B), heart rate recovery at two minutes (C) and heart rate recovery at 3 minutes (D)

**Table 2: Effect of age on heart rate response to exercise and recovery**

|                                                    | Young | Middle-Age | Older    |
|----------------------------------------------------|-------|------------|----------|
| <b>Heart Rate Response to Exercise (beats/min)</b> |       |            |          |
| At one minute                                      | 26±8  | 23±6       | 22±5     |
| At three minutes                                   | 24±7  | 23±7       | 26±7     |
| At five minutes                                    | 32±7  | 30±6       | 31±8     |
| At 1/3 exercise time                               | 34±8* | 32±7       | 26.1±7.4 |
| <b>Heart Rate Recovery (beats/min)</b>             |       |            |          |
| At one minute                                      | 44±15 | 46±15      | 38±10    |
| At two minutes                                     | 58±9* | 62±10*     | 50±11    |
| At three minutes                                   | 66±7* | 71±10*     | 59±16    |

\*significant difference from old (p<0.05)

**Table 3: Participant characteristics, resting and peak exercise cardiac and metabolic variables stratified by age and physical activity**

|                                                        | Young       |            | Middle-age  |             | Older       |            |
|--------------------------------------------------------|-------------|------------|-------------|-------------|-------------|------------|
|                                                        | High active | Low active | High active | Low active  | High active | Low active |
| <b>Demographics</b>                                    |             |            |             |             |             |            |
| Age, y                                                 | 28±1        | 25±3       | 44±3        | 45±4        | 70±5        | 74±5       |
| Weight, kg                                             | 59.7±7.5    | 73±18.2*   | 67.5±13.7   | 71.7±9.6    | 60.3±7.7    | 72.9±9.8*  |
| Height, m                                              | 1.67±0.06   | 1.60±0.07  | 1.67±0.05   | 1.66±0.06   | 1.57±0.06   | 1.60±0.04  |
| <b>Resting metabolic and cardiac variables</b>         |             |            |             |             |             |            |
| Oxygen consumption L/min                               | 0.27±0.07   | 0.24±0.10  | 0.27±0.05   | 0.24±0.03   | 0.23±0.03   | 0.25±0.02  |
| Oxygen consumption, ml/kg/min                          | 4.79±1.20   | 3.4±1.15*  | 4.10±0.90   | 3.31±0.54*  | 3.86±0.50   | 3.40±0.36* |
| Respiratory exchange ratio                             | 0.94±0.11   | 0.87±0.2   | 0.90±0.06   | 0.91±0.07   | 0.90±0.1    | 0.90±0.11  |
| Heart rate, bpm                                        | 73±12       | 78±10      | 70±13       | 71±10       | 71±8        | 70±9       |
| Stroke volume, mL/heart beat                           | 88±13       | 90±17      | 90±15       | 86±16       | 64±13       | 82±9*      |
| Cardiac power output, watts                            | 1.26±0.34   | 1.31±0.20  | 1.37±0.34   | 1.42±0.34   | 1.06±0.20   | 1.30±0.14  |
| Mean arterial pressure, mmHg                           | 89±8        | 89±9       | 97±11       | 102±10      | 106±12      | 102±9      |
| Cardiac output, L/min                                  | 6.4±1.2     | 6.7±1.0    | 6.3±1.3     | 6.2±1.3     | 4.5±0.7     | 5.6±0.5*   |
| Systemic vascular resistance dyne/(s-cm <sup>5</sup> ) | 1146±194    | 1086±183   | 1275±256    | 1366±309    | 1751±305    | 1500±191*  |
| <b>Peak exercise metabolic and cardiac variables</b>   |             |            |             |             |             |            |
| Oxygen consumption, L/min                              | 2.05±0.24   | 1.70±0.3*  | 2.24±0.39   | 1.62±0.44** | 1.45±0.3    | 1.3±0.14   |
| Oxygen consumption, ml/kg/min                          | 34.6±3.7    | 23.6±2.8** | 34.1±7.7    | 22.2±2.4**  | 24.1±3.8    | 17.8±2.1** |
| Respiratory exchange ratio                             | 1.17±0.08   | 1.16±0.1   | 1.17±0.07   | 1.24±0.08   | 1.19±0.1    | 1.2±0.10   |
| Heart rate, bpm                                        | 177±13      | 178±10     | 172±8       | 167±12      | 145±11      | 134±14     |
| Stroke Volume, mL                                      | 94±14       | 83±18      | 96±20       | 89±19       | 83±19       | 91±15      |
| Cardiac Output L/min                                   | 16.5±2.1    | 14.7±2.8   | 16.2±2.9    | 14.4±2.7    | 12.0±2.4    | 12.2±2.4   |
| Cardiac power output, watts                            | 4.00±0.71   | 3.73±0.90  | 4.24±0.72   | 4.00 ±0.86  | 3.40±0.70   | 3.36±0.77  |
| Mean arterial pressure, mmHg                           | 110±12      | 114±11     | 119±12      | 125±8       | 128±8       | 124±10     |
| Systemic vascular resistance dyne/(s-cm <sup>5</sup> ) | 542±101     | 633±104    | 604±120     | 715±128     | 805±198     | 840±167    |

\*significantly different from high active group (p<0.05); \*\* significantly different from high active group (p<0.01)

**Table 4: Heart rate response to exercise and recovery stratified by age and physical activity**

|                                                    | Young       |            | Middle-age  |            | Older       |            |
|----------------------------------------------------|-------------|------------|-------------|------------|-------------|------------|
|                                                    | High active | Low active | High active | Low active | High active | Low active |
| <b>Heart Rate Response to Exercise (beats/min)</b> |             |            |             |            |             |            |
| At one minute                                      | 22±5        | 30±8*      | 22±7        | 23±4       | 23±6        | 21±5       |
| At three minutes                                   | 20±6        | 28±6**     | 21±7        | 25±6       | 25±6        | 26±9       |
| At five minutes                                    | 30±8        | 35±6       | 29±5        | 32±7       | 31±9        | 31±6       |
| At 1/3 exercise time                               | 36±9        | 32±7       | 33±8        | 30±5       | 26±6        | 26±9       |
| <b>Heart Rate Recovery (beats/min)</b>             |             |            |             |            |             |            |
| At one minute                                      | 48±12       | 40±8       | 46±10       | 47±12      | 40±6        | 36±12      |
| At two minutes                                     | 62±10       | 55±7       | 63±10       | 60±12      | 53±8        | 48±14      |
| At three minutes                                   | 67±7        | 65±6       | 71±11       | 71±9       | 63±15       | 54±17      |

\*significantly different from high active group (p<0.05); \*\* significantly different from high active group (p<0.01)

Our finding that aging in the absence of cardiovascular and other chronic diseases leads to decline in cardiac autonomic function is in agreement with those of previous studies [20-22]. It has been suggested that age-related decline in cardiac vagal modulation is a result of a significant decline in cardiac parasympathetic activity [23]. The cause for the decline in autonomic control of the

heart is thought to be a result deterioration of cardiovagal baroreflex sensitivity [23]. One of the primary mechanisms believed to be responsible for such change is decline in arterial compliance (i.e. in carotid artery and aorta) which determines the amount of stretch to which baroreceptors are exposed for any change in intravascular pressure [8, 23]. Alterations in muscarinic receptors along with

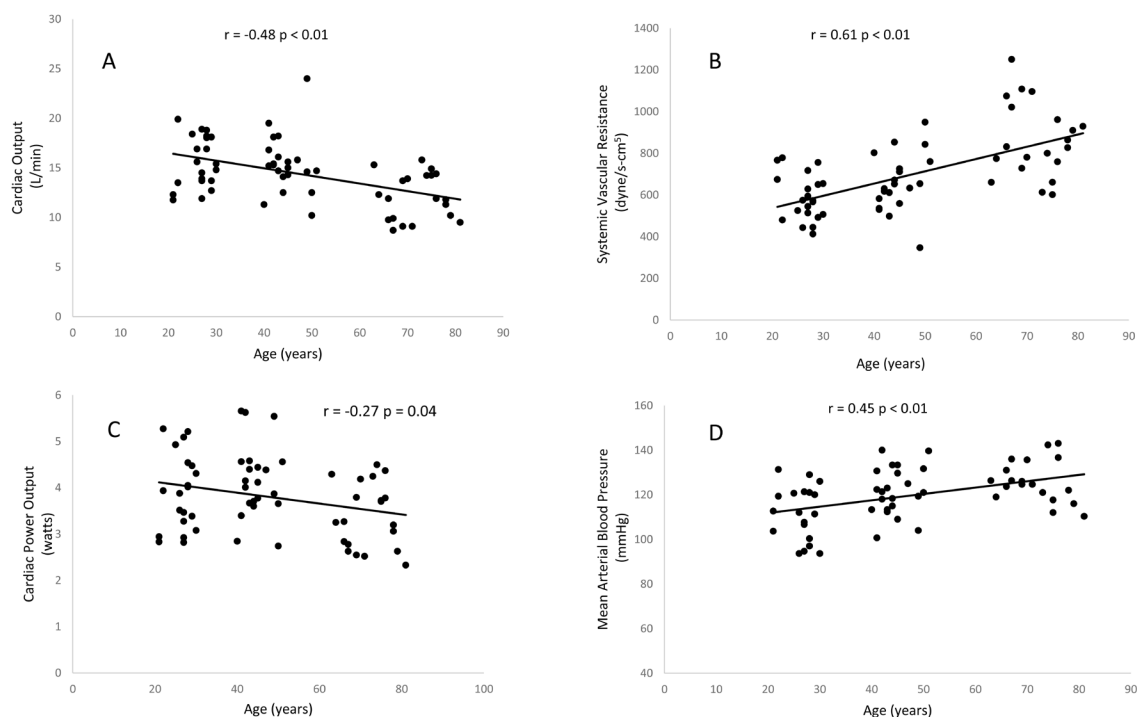

**Figure 2:** Relationship between age and maximum cardiac output (A), maximum systemic vascular resistance (B), maximum cardiac power output (C), maximum mean arterial pressure (D)



their signalling pathway has been considered a potential contributory factor in reduced baroreflex sensitivity with ageing [4].

The novel finding in the present study is that a high level of daily habitual physical activity (>12,500 steps/day) had no effect on heart rate response to exercise and recovery in middle- and older-age women. This is to some extent surprising considering the well-defined benefits of a physically active lifestyle on overall cardiovascular morbidity and mortality in both women and men [11-14]. In contrast to our study, which evaluated the effect of habitual (daily) physical activity in healthy women, many other studies evaluated the effect of exercise on cardiac autonomic regulation. Results of these studies suggest the benefits of exercise training on measures of cardiac autonomic function [16-19, 24-27]. It was postulated that the intensity of exercise in addition to its volume may play an important role in exercise-induced changes in cardiac autonomic regulation [27, 28]. In our study, the intensity level of physical activity that participants demonstrated (i.e. <6 metabolic equivalent units, likely represented by slow walking) was perhaps lower than a standard aerobic or high intensity interval exercise training, or even brisk walking recommended by the public health authorities. This may further suggest that potentially there are specific requirements in the intensity and duration of physical activity and exercise in order to induce beneficial changes in cardiac autonomic function and that increased level of daily (habitual) physical activity (e.g. slow walking) may not be sufficient to attenuate decline in cardiac autonomic function with ageing. A previous study also reported that recreational endurance athletes demonstrate significantly greater sympathetic modulation compared to the general population [29], further suggesting that chronic exposure to exercise may be required for potentially greater benefits to cardiac autonomic function.

In contrast with cardiac autonomic regulation, the data demonstrate that cardiorespiratory fitness (aerobic capacity), represented by peak oxygen consumption and exercise performance (work rate), and were markedly influenced by daily activity. One of the physiological mechanisms that may explain such finding is that anaerobic threshold point occurs significantly earlier in low active than in those highly active women. As the rate of lactate acid production and accumulation exceeds its removal from the muscle, it is likely to cause an onset of fatigue and consequent termination of the exercise test earlier, resulting in lower exercise performance (work rate) in inactive women.

The present study is not without limitations. All subjects in this study were female and as previously stated, there are physiological gender differences in cardiovascular adaptations to aging and physical activity. All of the women who took part in the study were Caucasian, therefore it is not known whether these results are applicable to women of a different ethnicity.

Study participants were also not followed longitudinally to observe any potential changes in cardiac autonomic functions that may occur with further ageing.

In conclusion, the present study is the first to demonstrate the effect of objectively assessed daily physical activity on age-related changes in cardiac autonomic function. Our results confirm that aging is associated with a significant decline in cardiac autonomic function, and provide novel evidence that high level of daily physical activity has a limited effect on age-related decline in cardiac autonomic function. Further investigations are warranted to develop effective interventions to improve cardiac autonomic function in older age.

## MATERIALS AND METHODS

In this prospective, observational, single-centre study 72 healthy women were recruited from the Newcastle upon Tyne area (United Kingdom) into three age groups: young- (ages 20-30 years, n=24), middle- (ages 40-50 years, n=24), and older-age (65-81 years, n=24) women. Subjects were included into the study if their objectively evaluated average daily physical activity level fell into a low active i.e. <7,500 steps/day group or a high active group i.e. >12,500 steps/day, as previously suggested [30]. Participants were not stratified according to their workplace activity but rather overall physical activity levels but with no intention participating in an exercise programme or training regime. Only subjects with normal fasting glucose and lipid profile, body mass index <30 kg/m<sup>2</sup>; normal resting blood pressure and electrocardiogram and able to undertake a maximal graded cardiopulmonary exercise stress test were included. Subjects were excluded if they: (i) had any prior history of cardiovascular or chronic pulmonary disease, diabetes, or were using medication known to effect cardiovascular function, current or previous smoking or exercise-limiting orthopaedic impairment; (ii) performed regular exercise (≥2 times week) over the previous three years or had been professional or semi-professional athletes; (iii) performed an average daily number of steps between 7,500 and 12,500 steps/day. All subjects signed an informed consent form and the study was approved by the NHS Sunderland Research Ethics Committee.

Physical activity was assessed objectively using a validated portable multi-sensor array (Sensewear Pro3, Bodymedia Inc, PA, USA) [31]. The monitor was worn for seven days and was only removed for bathing. Additionally, self-reported physical activity measurement was assessed using the International Physical Activity Questionnaire [32]. All subjects performed a maximal graded cardiopulmonary exercise test using an electromagnetically controlled semi-recumbent cycle ergometer (Corival, Lode, Groningen, Netherlands) with online gas exchange measurements (Metalyzer 3B, Cortex, Leipzig,

Germany) and non-invasive central hemodynamics by the bioactance method (NICOM, Cheetah Medical, Delaware, USA), as previously described [33-35]. The maximal progressive exercise test included cycling at 20 watts for 3 minutes followed by 10-watt increments every minute until volitional exhaustion. The 12-lead ECG (Custo, CustoMed GmbH, Ottobrunn, Germany) was continuously monitored and blood pressure (Tango, SunTech Medical, Morrisville, NS, USA) recorded at rest, during exercise and recovery. The test was terminated when the subject was unable to pedal at a cadence of 50 revolutions per minute or they reached maximal oxygen consumption i.e. no further increase in oxygen uptake despite increase in work load. Peak oxygen consumption was defined as the average oxygen uptake during the last minute of exercise. Cardiac power output (expressed in watts), a measure of overall cardiac function and pumping capability, was calculated as the product of cardiac output and mean arterial blood pressure [3].

Prior to graded exercise testing, resting heart rate (HR) was calculated as the mean HR during the last five minutes of the 10 minute supine rest. The change in HR at one minute of exercise was calculated as the difference between HR at one minute of exercise and immediately prior to commencing exercise [8]. The change in HR at three minutes of exercise was calculated as the differences between HR at three minutes of exercise and immediately prior to commencing exercise. The change in HR at five minutes of exercise was calculated as the differences between HR at five minutes exercise and immediately prior to commencing exercise. The change in HR at 1/3 exercise time was calculated as the difference between HR immediately prior to commencing exercise and the HR at 1/3 of the completed exercise time. Once graded cardiopulmonary exercise testing was completed, participants undertook a 10 minute seated recovery during which HR was recorded. Heart rate recovery (HRR) was calculated as the difference between peak HR and HR recorded one, two and three minutes post completion of the graded cardiopulmonary exercise testing [8].

All statistical analysis was carried out using SPSS version 19.0 (SPSS inc. Chicago, Illinois, USA). Prior to statistical analysis, data were checked for univariate and multivariate outliers using standard Z-distribution cut-offs and Mahalanobis distance tests. Normality of distribution was assessed using a Kolmogorov-Smirnov test. Two-way analysis of variance (ANOVA) was used to determine the main effects of age and physical activity and the interaction between the age and physical activity. The difference between low active and high active women within the same age group was identified using independent t-tests or Mann Whitney U test, as appropriate with Bonferroni correction for multiple comparisons. Pearson's or Spearman's coefficient of correlation was used to assess the relationship between the age and measures of cardiac autonomic function variables, as appropriate. Statistical

significance was indicated if  $P < 0.05$ . All data are presented as mean  $\pm$  SD unless otherwise indicated.

## ACKNOWLEDGMENTS

We thank the participants for contributing to this study.

## CONFLICTS OF INTERESTS

The authors declare no conflicts of interests.

## FUNDING

This study was funded by the Newcastle National Institute for Health Research (NIHR) Biomedical Research Centre in Ageing and Age Related Diseases and Research Councils UK Centre for Ageing and Vitality. Dr Jakovljevic is supported by Research Councils UK Centre for Ageing and Vitality (L016354), and MIT by NIHR Senior Research Fellowship (SRF-2011-04-017).

## REFERENCES

1. North BJ, Sinclair DA The intersection between aging and cardiovascular disease. *Circ Res.* 2012; 110: 1097-1108.
2. Lakatta EG So! What's aging? Is cardiovascular aging a disease? *J Mol Cell Cardiol.* 2015; 83: 1-13.
3. Jakovljevic DG, Papakonstantinou L, Blamire AM, MacGowan GA, Taylor R, et al. Effect of physical activity on age-related changes in cardiac function and performance in women. *Circ Cardiovasc Imaging* 8.
4. Kaye DM, Esler MD. Autonomic control of the aging heart. *Neuromolecular Med.* 2008; 10: 179-186.
5. Edward G Lakatta SJS. The "Heartbreak" of Older Age. *Molecular Interventions.* 2002; 2: 431-446.
6. Kleiger RE, Miller JP, Bigger JT, Jr., Moss AJ. Decreased heart rate variability and its association with increased mortality after acute myocardial infarction. *Am J Cardiol.* 1987; 59: 256-262.
7. Jouven X, Empana JP, Schwartz PJ, Desnos M, Courbon D, et al. Heart-rate profile during exercise as a predictor of sudden death. *N Engl J Med.* 2005; 352: 1951-1958.
8. Nunan D, Jakovljevic DG, Donovan G, Singleton LD, Sandercock GR, et al. Resting autonomic modulations and the heart rate response to exercise. *Clin Auton Res.* 2010; 20: 213-221.
9. Cole CR, Blackstone EH, Pashkow FJ, Snader CE, Lauer MS. Heart-rate recovery immediately after exercise as a predictor of mortality. *N Engl J Med.* 1999; 341: 1351-1357.
10. Leeper NJ, Dewey FE, Ashley EA, Sandri M, Tan SY, et al. Prognostic value of heart rate increase at onset of exercise testing. *Circulation.* 2007; 115: 468-474.

11. Shiroma EJ, Lee IM. Physical activity and cardiovascular health: lessons learned from epidemiological studies across age, gender, and race/ethnicity. *Circulation*. 2010; 122: 743-752.
12. Blair SN, Kohl HW, 3rd, Barlow CE, Paffenbarger RS, Jr., Gibbons LW, et al. Changes in physical fitness and all-cause mortality. A prospective study of healthy and unhealthy men. *JAMA*. 1995; 273: 1093-1098.
13. Talbot LA, Morrell CH, Fleg JL, Metter EJ. Changes in leisure time physical activity and risk of all-cause mortality in men and women: the Baltimore Longitudinal Study of Aging. *Prev Med*. 2007; 45: 169-176.
14. Eijssvogels TM, Molossi S, Lee DC, Emery MS, Thompson PD. Exercise at the Extremes: The Amount of Exercise to Reduce Cardiovascular Events. *J Am Coll Cardiol*. 2016; 67: 316-329.
15. Chomistek AK, Manson JE, Stefanick ML, Lu B, Sands-Lincoln M, et al. The Relationship of Sedentary Behavior and Physical Activity to Incident Cardiovascular Disease: Results from the Women's Health Initiative. *J Am Coll Cardiol*. 2013.
16. Kingwell BA, Dart AM, Jennings GL, Korner PI (1992) Exercise training reduces the sympathetic component of the blood pressure-heart rate baroreflex in man. *Clin Sci (Lond)*. 1992; 82: 357-362.
17. Liu JL, Irvine S, Reid IA, Patel KP, Zucker IH. Chronic exercise reduces sympathetic nerve activity in rabbits with pacing-induced heart failure: A role for angiotensin II. *Circulation*. 2000; 102: 1854-1862.
18. Danieli A, Lusa L, Potocnik N, Meglic B, Grad A, et al. Resting heart rate variability and heart rate recovery after submaximal exercise. *Clin Auton Res*. 2014; 24: 53-61.
19. Jolly MA, Brennan DM, Cho L. Impact of exercise on heart rate recovery. *Circulation*. 2011; 124: 1520-1526.
20. Carnethon MR, Sternfeld B, Liu K, Jacobs DR, Jr., Schreiner PJ, et al. Correlates of heart rate recovery over 20 years in a healthy population sample. *Med Sci Sports Exerc*. 2012; 44: 273-279.
21. Trevizani GA, Benchimol-Barbosa PR, Nadal J. Effects of age and aerobic fitness on heart rate recovery in adult men. *Arq Bras Cardiol*. 2012; 99: 802-810.
22. Zhang J. Effect of age and sex on heart rate variability in healthy subjects. *J Manipulative Physiol Ther*. 2007; 30: 374-379.
23. Bonnemeier H, Richardt G, Potratz J, Wiegand UK, Brandes A, et al. Circadian profile of cardiac autonomic nervous modulation in healthy subjects: differing effects of aging and gender on heart rate variability. *J Cardiovasc Electrophysiol*. 2003; 14: 791-799.
24. Kingsley JD, McMillan V, Figueroa A (2010) The effects of 12 weeks of resistance exercise training on disease severity and autonomic modulation at rest and after acute leg resistance exercise in women with fibromyalgia. *Arch Phys Med Rehabil*. 2010; 91: 1551-1557.
25. Kline CE, Crowley EP, Ewing GB, Burch JB, Blair SN, et al. Blunted heart rate recovery is improved following exercise training in overweight adults with obstructive sleep apnea. *Int J Cardiol*. 2013; 167: 1610-1615.
26. Currie KD, Rosen LM, Millar PJ, McKelvie RS, Macdonald MJ. Heart rate recovery and heart rate variability are unchanged in patients with coronary artery disease following 12 weeks of high-intensity interval and moderate-intensity endurance exercise training. *Appl Physiol Nutr Metab*. 2013; 38: 644-650.
27. Yaylali YT, Findikoglu G, Yurtdas M, Konukcu S, Senol H. The effects of baseline heart rate recovery normality and exercise training protocol on heart rate recovery in patients with heart failure. *Anat J Cardiol*. 2015; 15: 727-734.
28. Darr KC, Bassett DR, Morgan BJ, Thomas DP. Effects of age and training status on heart rate recovery after peak exercise. *Am J Physiol*. 1988; 254: H340-343.
29. Foulds HJ, Cote AT, Phillips AA, Charlesworth SA, Bredin SS, et al. Characterisation of baroreflex sensitivity of recreational ultra-endurance athletes. *Eur J Sport Sci*. 2014; 14: 686-694.
30. Tudor-Locke C, Bassett DR, Jr. How many steps/day are enough? Preliminary pedometer indices for public health. *Sports Med*. 2004; 34: 1-8.
31. St-Onge M, Mignault D, Allison DB, Rabasa-Lhoret R. Evaluation of a portable device to measure daily energy expenditure in free-living adults. *Am J Clin Nutr*. 2007; 85: 742-749.
32. Craig CL, Marshall AL, Sjostrom M, Bauman AE, Booth ML, et al. International physical activity questionnaire: 12-country reliability and validity. *Med Sci Sports Exerc*. 2003; 35: 1381-1395.
33. Jakovljevic DG, Moore S, Hallsworth K, Fattakhova G, Thoma C, et al. Comparison of cardiac output determined by bioimpedance and bioreactance methods at rest and during exercise. *J Clin Monit Comput*. 2012; 26: 63-68.
34. Jones TW, Houghton D, Cassidy S, MacGowan GA, Trenell MI, et al. Bioreactance is a reliable method for estimating cardiac output at rest and during exercise. *Br J Anaesth*. 2015; 115: 386-391.
35. Jakovljevic DG, Trenell MI, MacGowan GA. Bioimpedance and bioreactance methods for monitoring cardiac output. *Best Pract Res Clin Anaesthesiol*. 2014; 28: 381-394.
